# Supplementary material for: Characterization of vaginal microbiota in women with preterm labor with intra-amniotic inflammation
Source: PubMed Central journal article supplement (PMC6908687; doi:10.1038/s41598-019-55611-y), 2019-12-12

**Characterization of vaginal microbiota in women with preterm labor with  
intra-amniotic inflammation**

Teresa Cobo\*, M.D., Ph.D; Andrea Vergara, PharmD; Maria Carmen Collado,  
Ph.D; Climent Casals-Pascual, M.D., Ph.D; Eduardo Herreros, MSc; Jordi  
Bosch, M.D., Ph.D; Ana B Sánchez-García, BSc; Rosa López-Parellada, MSc;  
Júlia Ponce, M.D., Eduard Gratacós, M.D., Ph.D.

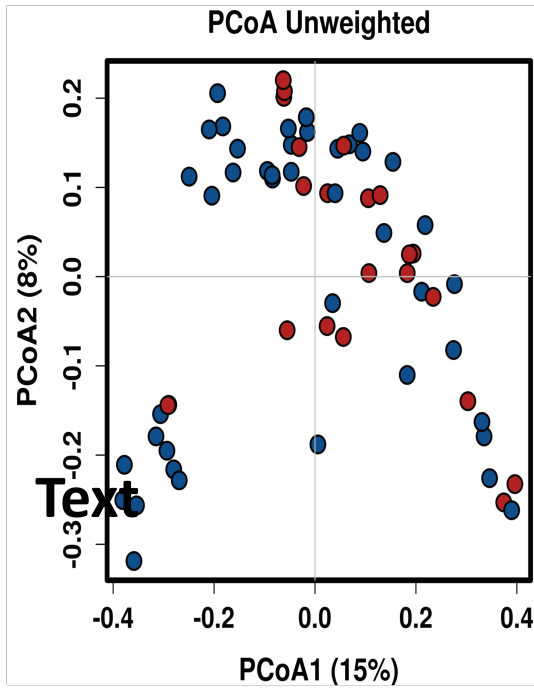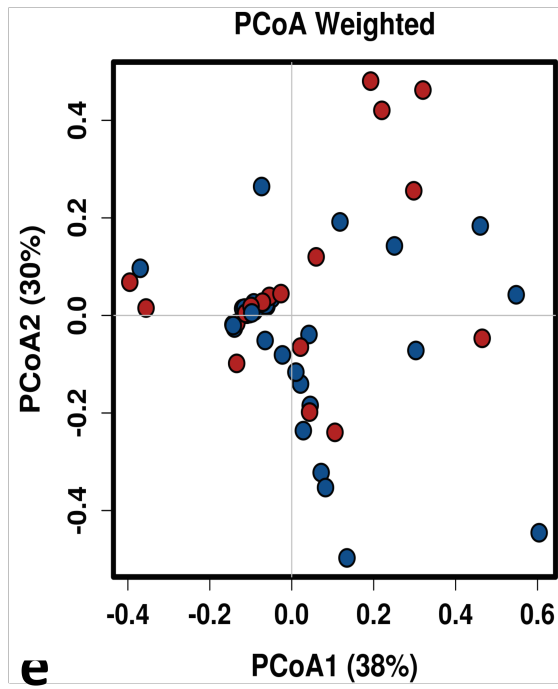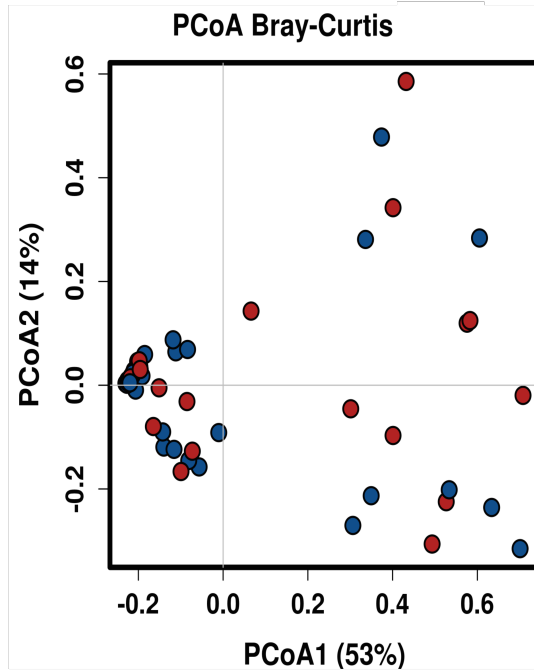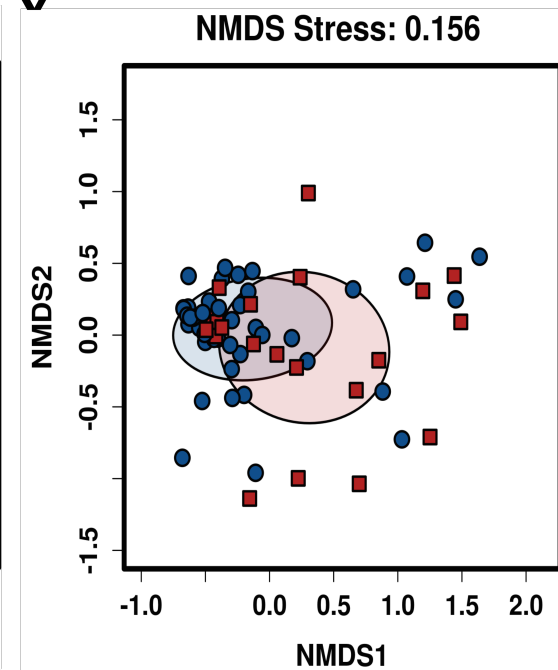

Supplement: 41598_2019_55611_MOESM1_ESM.pdf [file 41598_2019_55611_MOESM1_ESM.pdf]
